# Supplementary material for: 4-Phenylbutyric acid enhances the mineralization of osteogenesis imperfecta iPSC-derived osteoblasts
Source: PubMed Central journal article supplement (PMC7948972; doi:10.1074/jbc.ra120.014709), 2020-11-23
Supplement: mmc1.pdf [file mmc1.pdf]

## **4-phenylbutyric acid enhances the mineralization of osteogenesis imperfecta iPSC-derived osteoblasts**

Shinji Takeyari<sup>1</sup>, Takuo Kubota<sup>1\*</sup>, Yasuhisa Ohata<sup>1</sup>, Makoto Fujiwara<sup>1</sup>, Taichi Kitaoka<sup>1</sup>, Yuki Taga<sup>2</sup>, Kazunori Mizuno<sup>2</sup>, Keiichi Ozono<sup>1</sup>

<sup>1</sup>Department of Pediatrics, Osaka University Graduate School of Medicine, Suita, Osaka 565-0871, Japan

<sup>2</sup> Nippi Research Institute of Biomatrix, Toride, Ibaraki 302-0017, Japan

\*Corresponding author: Takuo Kubota

Email: [tkubota@ped.med.osaka-u.ac.jp](mailto:tkubota@ped.med.osaka-u.ac.jp)

### **Supporting information list**

Table S1  
Figure S1  
Figure S2  
Figure S3  
Figure S4  
Figure S5  
Figure S6  
Figure S7  
Figure S8  
Figure S9  
Figure S10  
Figure S11  
Figure S12  
Figure S13  
Figure S14

**Table S1.** The list of primer sequences used for real-time quantitative PCR

| Gene          |         | Primer sequence                    |
|---------------|---------|------------------------------------|
| <i>COL1A1</i> | Forward | 5'- GGGATTCCCTGGACCTAAAG -3'       |
|               | Reverse | 5'- GGAACACCTCGCTCTCCA -3'         |
| <i>COL1A2</i> | Forward | 5'- AGAGGACCACGTGGAGAAAG -3'       |
|               | Reverse | 5'- GGCCTGTGGGACCATCTT -3'         |
| <i>ACTB</i>   | Forward | 5'- TCAAGATCATTGCTCCTCCTGAG -3'    |
|               | Reverse | 5'- ACATCTGCTGGAAGGTGGACA -3'      |
| <i>BIP</i>    | Forward | 5'- TGTTCAACCAATTATCAGCAAACCTC -3' |
|               | Reverse | 5'- TTCTGCTGTATCCTCTTACCAGT -3'    |
| <i>CHOP</i>   | Forward | 5'- AGAACCAGGAAACGGAAACAGA -3'     |
|               | Reverse | 5'- TCTCCTTCATGCGCTGCTTT -3'       |
| <i>OCT4</i>   | Forward | 5'- TGTACTCCTCGGTCCCTTTC -3'       |
|               | Reverse | 5'- TCCAGGTTTTCTTTCCCTAGC -3'      |
| <i>NANOG</i>  | Forward | 5'- CAGTCTGGACACTGGCTGAA -3'       |
|               | Reverse | 5'- CTCGCTGATTAGGCTCCAAC -3'       |
| <i>CD44</i>   | Forward | 5'- ATGGACAAGTTTTGGTGGCAC -3'      |
|               | Reverse | 5'- AATACACCTGCAAAGCGGCA -3'       |
| <i>NT5E</i>   | Forward | 5'- CACTATCTGGTTCACCGTGTACA -3'    |
|               | Reverse | 5'- CGATCAGTCCTTCCACACCAT -3'      |
| <i>RUNX2</i>  | Forward | 5'- TAGCAAGGTTCAACGATCTGAG -3'     |
|               | Reverse | 5'- AGCTTCTGTCTGTGCCTTCTG -3'      |
| <i>ALPL</i>   | Forward | 5'- CCTCGTTGACACCTGGAAGAG -3'      |
|               | Reverse | 5'- TTCCGTGCGGTTCCAGA -3'          |
| <i>PARP1</i>  | Forward | 5'- AGACAGTGTGCAGGCCAAG -3'        |
|               | Reverse | 5'- ACTTCCTGATGATCTCGGCTTC -3'     |
| <i>PARP2</i>  | Forward | 5'- GATGGTATGCCAGGAAGGTCA -3'      |
|               | Reverse | 5'- TGTTGAACTGGAGATTGGTCTGA -3'    |
| <i>ENPP1</i>  | Forward | 5'- CACTACAGCATTGTCACCGGAT -3'     |
|               | Reverse | 5'- GGCCTTGATACTTAGCTGTGACC -3'    |
| <i>ANKH</i>   | Forward | 5'- CTCTGTCACTCACGCTCTGT -3'       |
|               | Reverse | 5'- TCTTCAGTGTCATCAGCCACC -3'      |

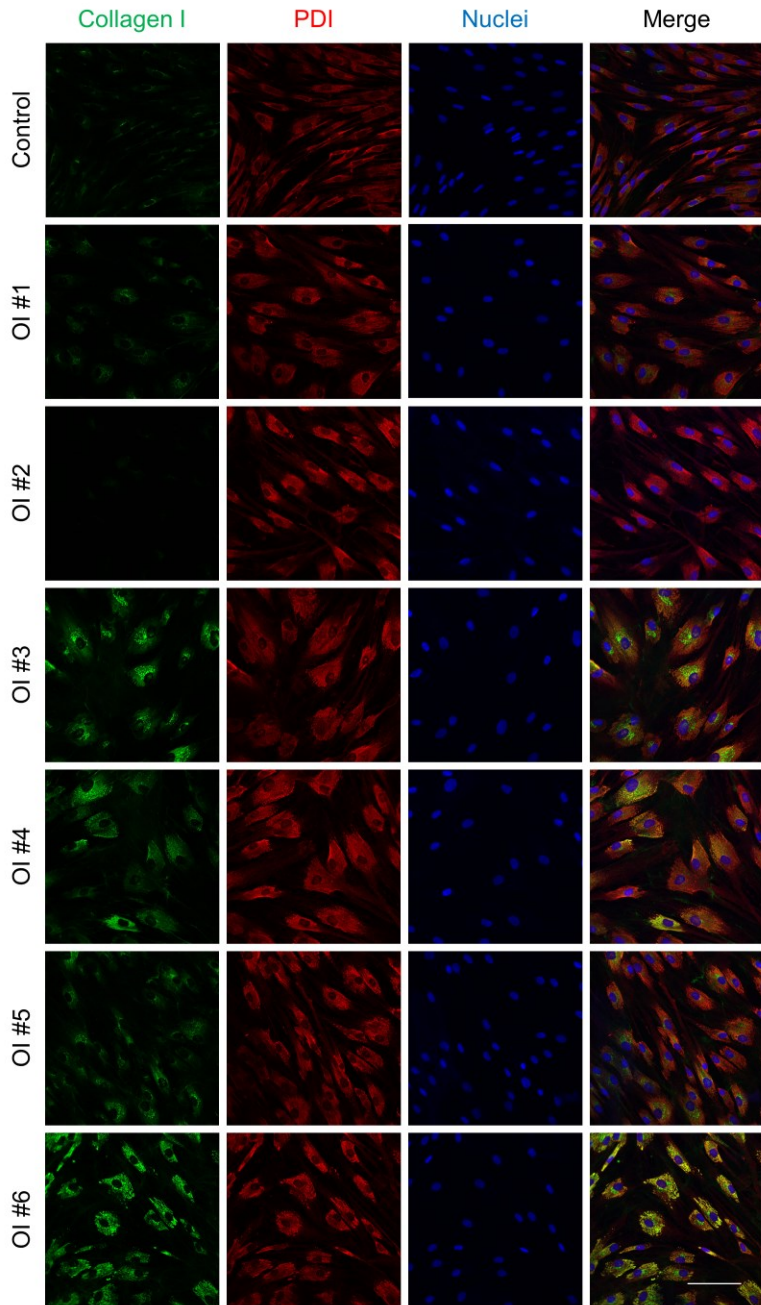

**Figure S1.** Immunofluorescence staining of dermal fibroblasts. Type I collagen is in green. Endoplasmic reticulum marker protein, disulfide isomerase (PDI), is in red. Nuclei are in blue. Image panels of Control, OI #2 and OI #3 are redisplay of image panels of Figure 1. Scale bar is 100  $\mu$ m.

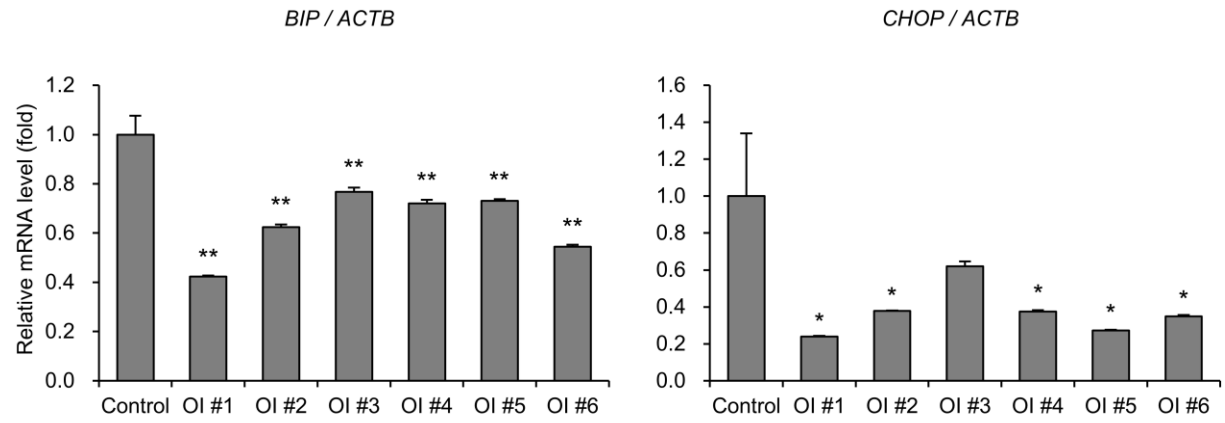

**Figure S2.** Real-time quantitative PCR of *BIP* and *CHOP*. Data are mean  $\pm$  SEM. Differences were tested by ANOVA followed by Tukey's HSD post hoc test. \* $P < 0.05$  vs. control, \*\* $P < 0.01$  vs. control.

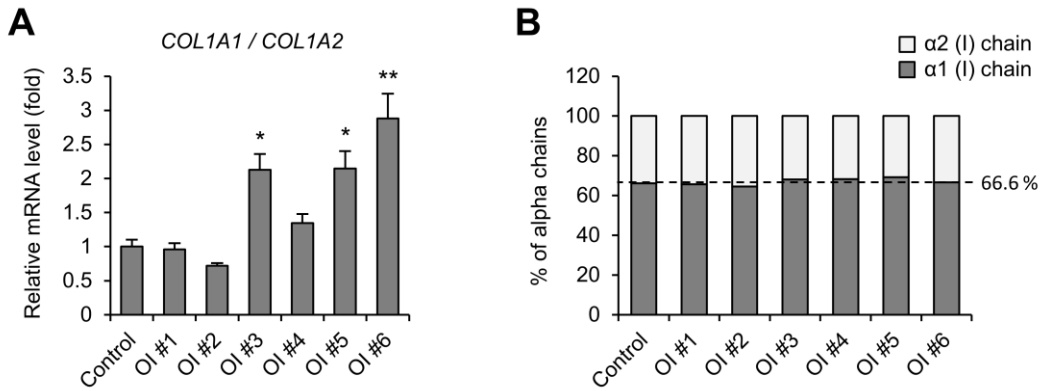

**Figure S3.** Comparison of  $\alpha 1$  and 2 chains of type I collagen. **A.** The ratio of the gene expression of *COL1A1* to *COL1A2*. **B.** The percentage of  $\alpha 1$  and 2 chains of type I collagen in conditioned medium. Data are mean  $\pm$  SEM. Differences were tested by ANOVA followed by Tukey's HSD post hoc test. \* $P < 0.05$  vs. control, \*\* $P < 0.01$  vs. control.

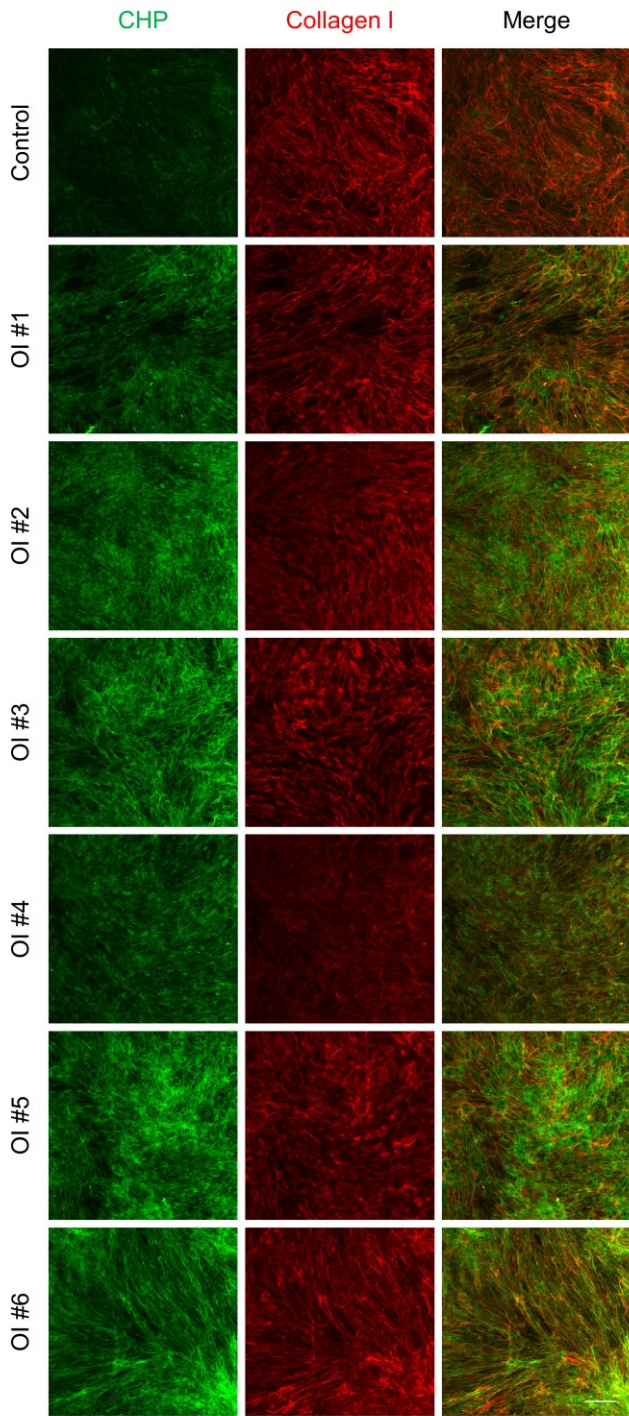

**Figure S4.** Fluorescence staining of deposited collagen. Unfolded triple-helical chains are stained in green by collagen hybridizing peptide (CHP). Type I collagen is stained in red. Image panels of Control and OI #3 are redispays of image panels of Figure 4. Scale bar is 200  $\mu$ m.



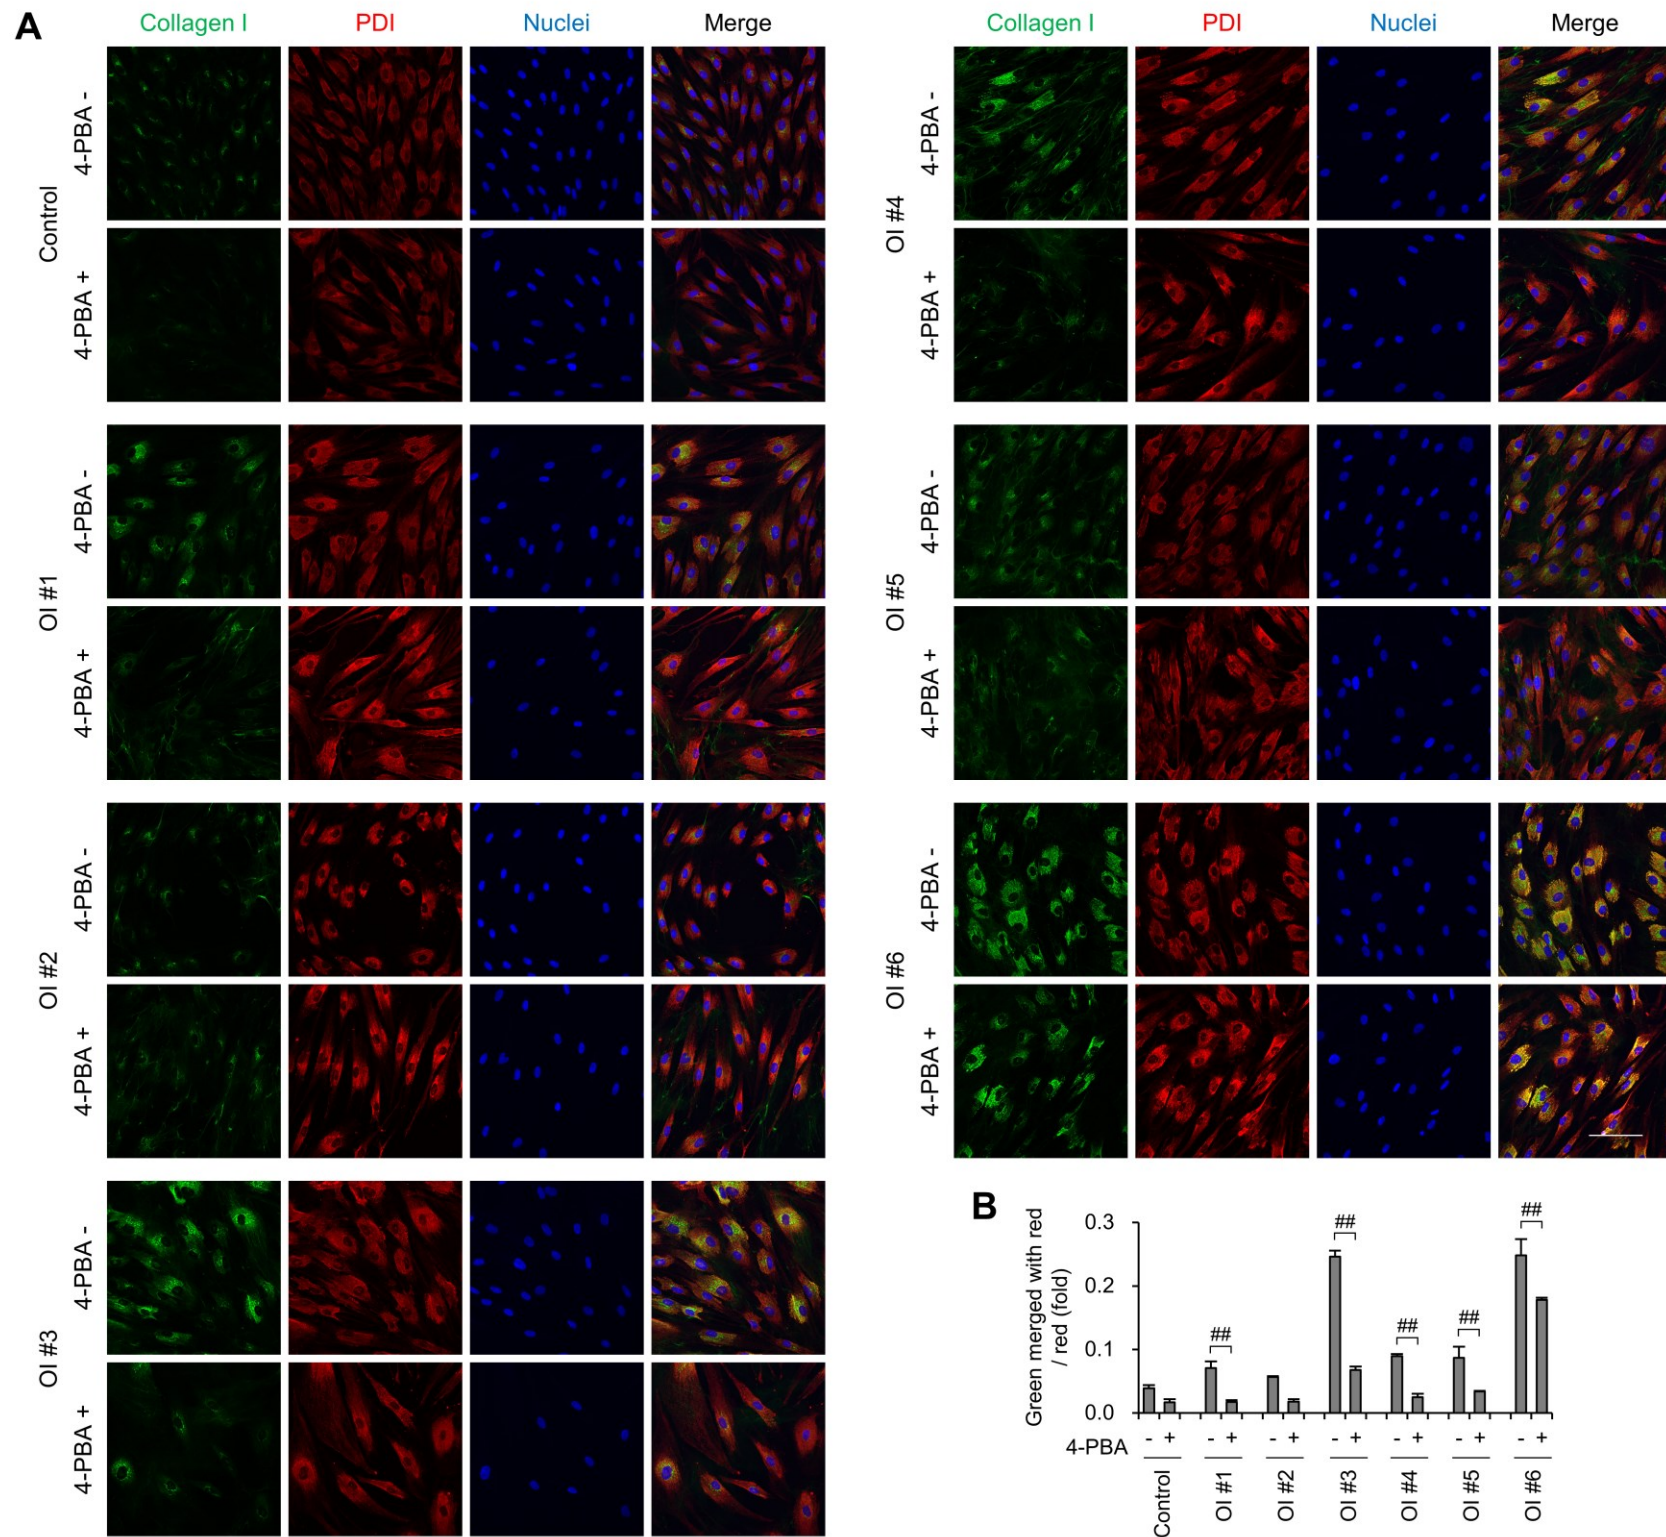

**Figure S5.** Immunofluorescence staining of dermal fibroblasts treated with or without 5 mM 4-phenylbutyric acid (4-PBA). **A.** Immunofluorescence staining of dermal fibroblasts. Type I collagen is in green. The endoplasmic reticulum marker protein, disulfide isomerase (PDI), is in red. Nuclei are in blue. Image panels of OI #3 are redispays of image panels of Figure 5. Scale bar is 100  $\mu$ m. **B.** Calculated values of green area merged with red area divided by red area of immunofluorescence staining. Data are mean  $\pm$  SEM. Differences were tested by ANOVA followed by Tukey's HSD post hoc test. ## $P < 0.01$ .

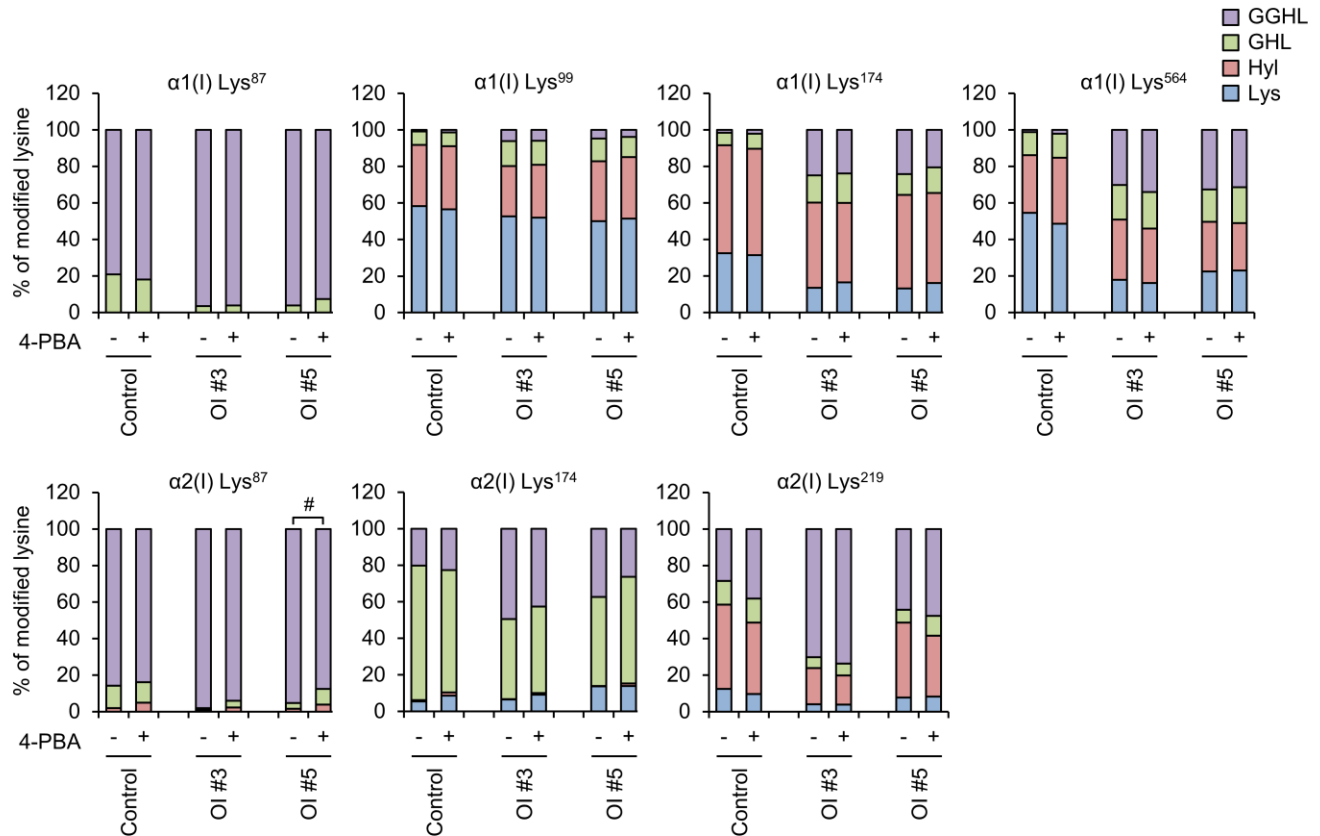

**Figure S6.** The effect of 4-phenylbutyric acid (4-PBA) on post-translational modification of type I collagen. Each cell line was treated with or without 5 mM 4-PBA. The percentage of post-translational modifications at Lys<sup>87</sup>, Lys<sup>99</sup>, Lys<sup>174</sup>, and Lys<sup>564</sup> of  $\alpha1$  and Lys<sup>87</sup>, Lys<sup>174</sup>, and Lys<sup>219</sup> of  $\alpha2$  chain of type I collagen analyzed by LC-MS. Control is the average of 2 cell lines. Hyl, hydroxylysine; GHL, galactosyl-hydroxylysine; GGHL, glucosyl-galactosyl-hydroxylysine. Differences in the ratio of GGHL to non-GGHL were tested by Pearson's chi-square test. # $P < 0.05$ , ## $P < 0.01$ .



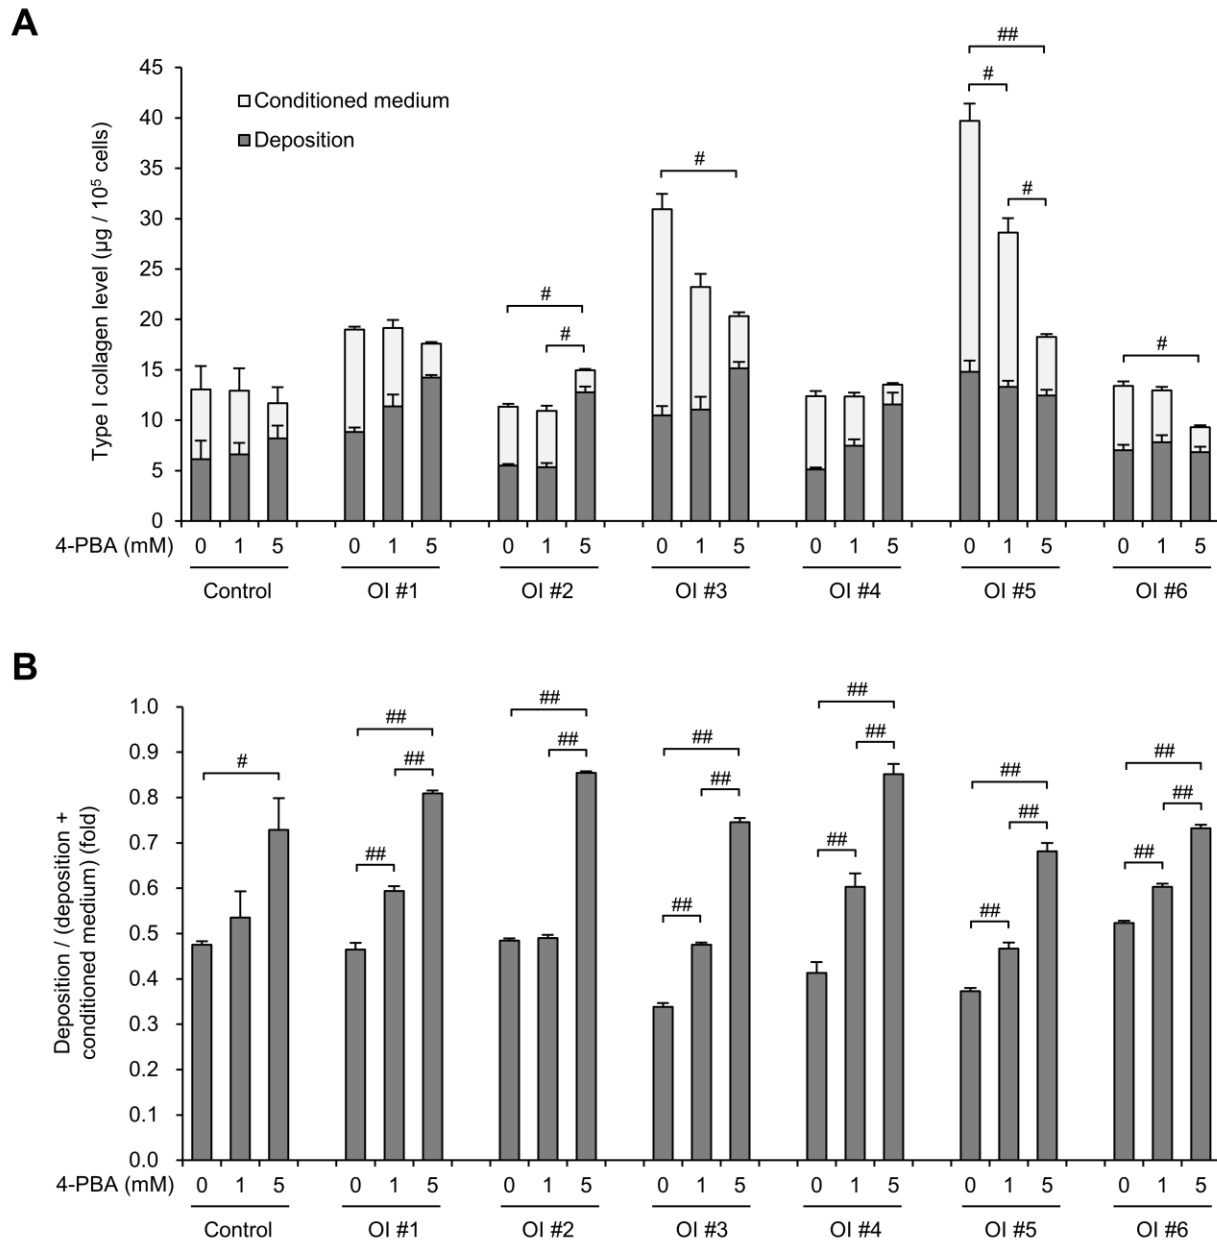

**Figure S7.** The effect of 4-phenylbutyric acid (4-PBA) on the production of type I collagen. **A.** Protein levels of type I collagen in conditioned medium and deposited on the dish measured by ELISA. **B.** Calculated values of protein levels of type I collagen. The formula for calculation is as follows: protein levels deposited on the dish/(protein levels deposited on the dish + protein levels in conditioned medium). All data are mean  $\pm$  SEM. Differences were tested by ANOVA followed by Tukey's HSD post hoc test. # $P < 0.05$ , ## $P < 0.01$ .

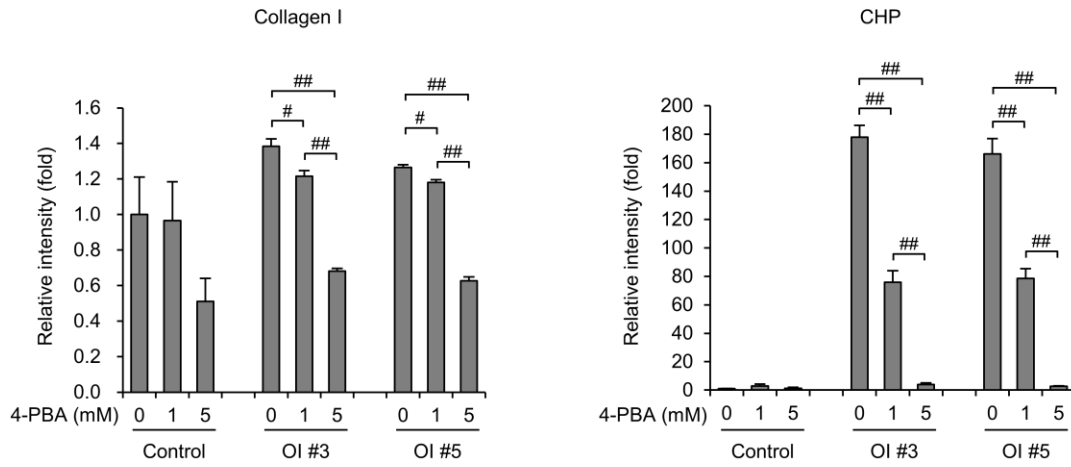

**Figure S8.** Calculated values of fluorescence staining. The formula for calculation is as follows: red area  $\times$  red fluorescence density for type I collagen and green area  $\times$  green fluorescence density for CHP. Data are mean  $\pm$  SEM. Differences were tested by ANOVA followed by Tukey's HSD post hoc test. # $P < 0.05$ , ## $P < 0.01$ .



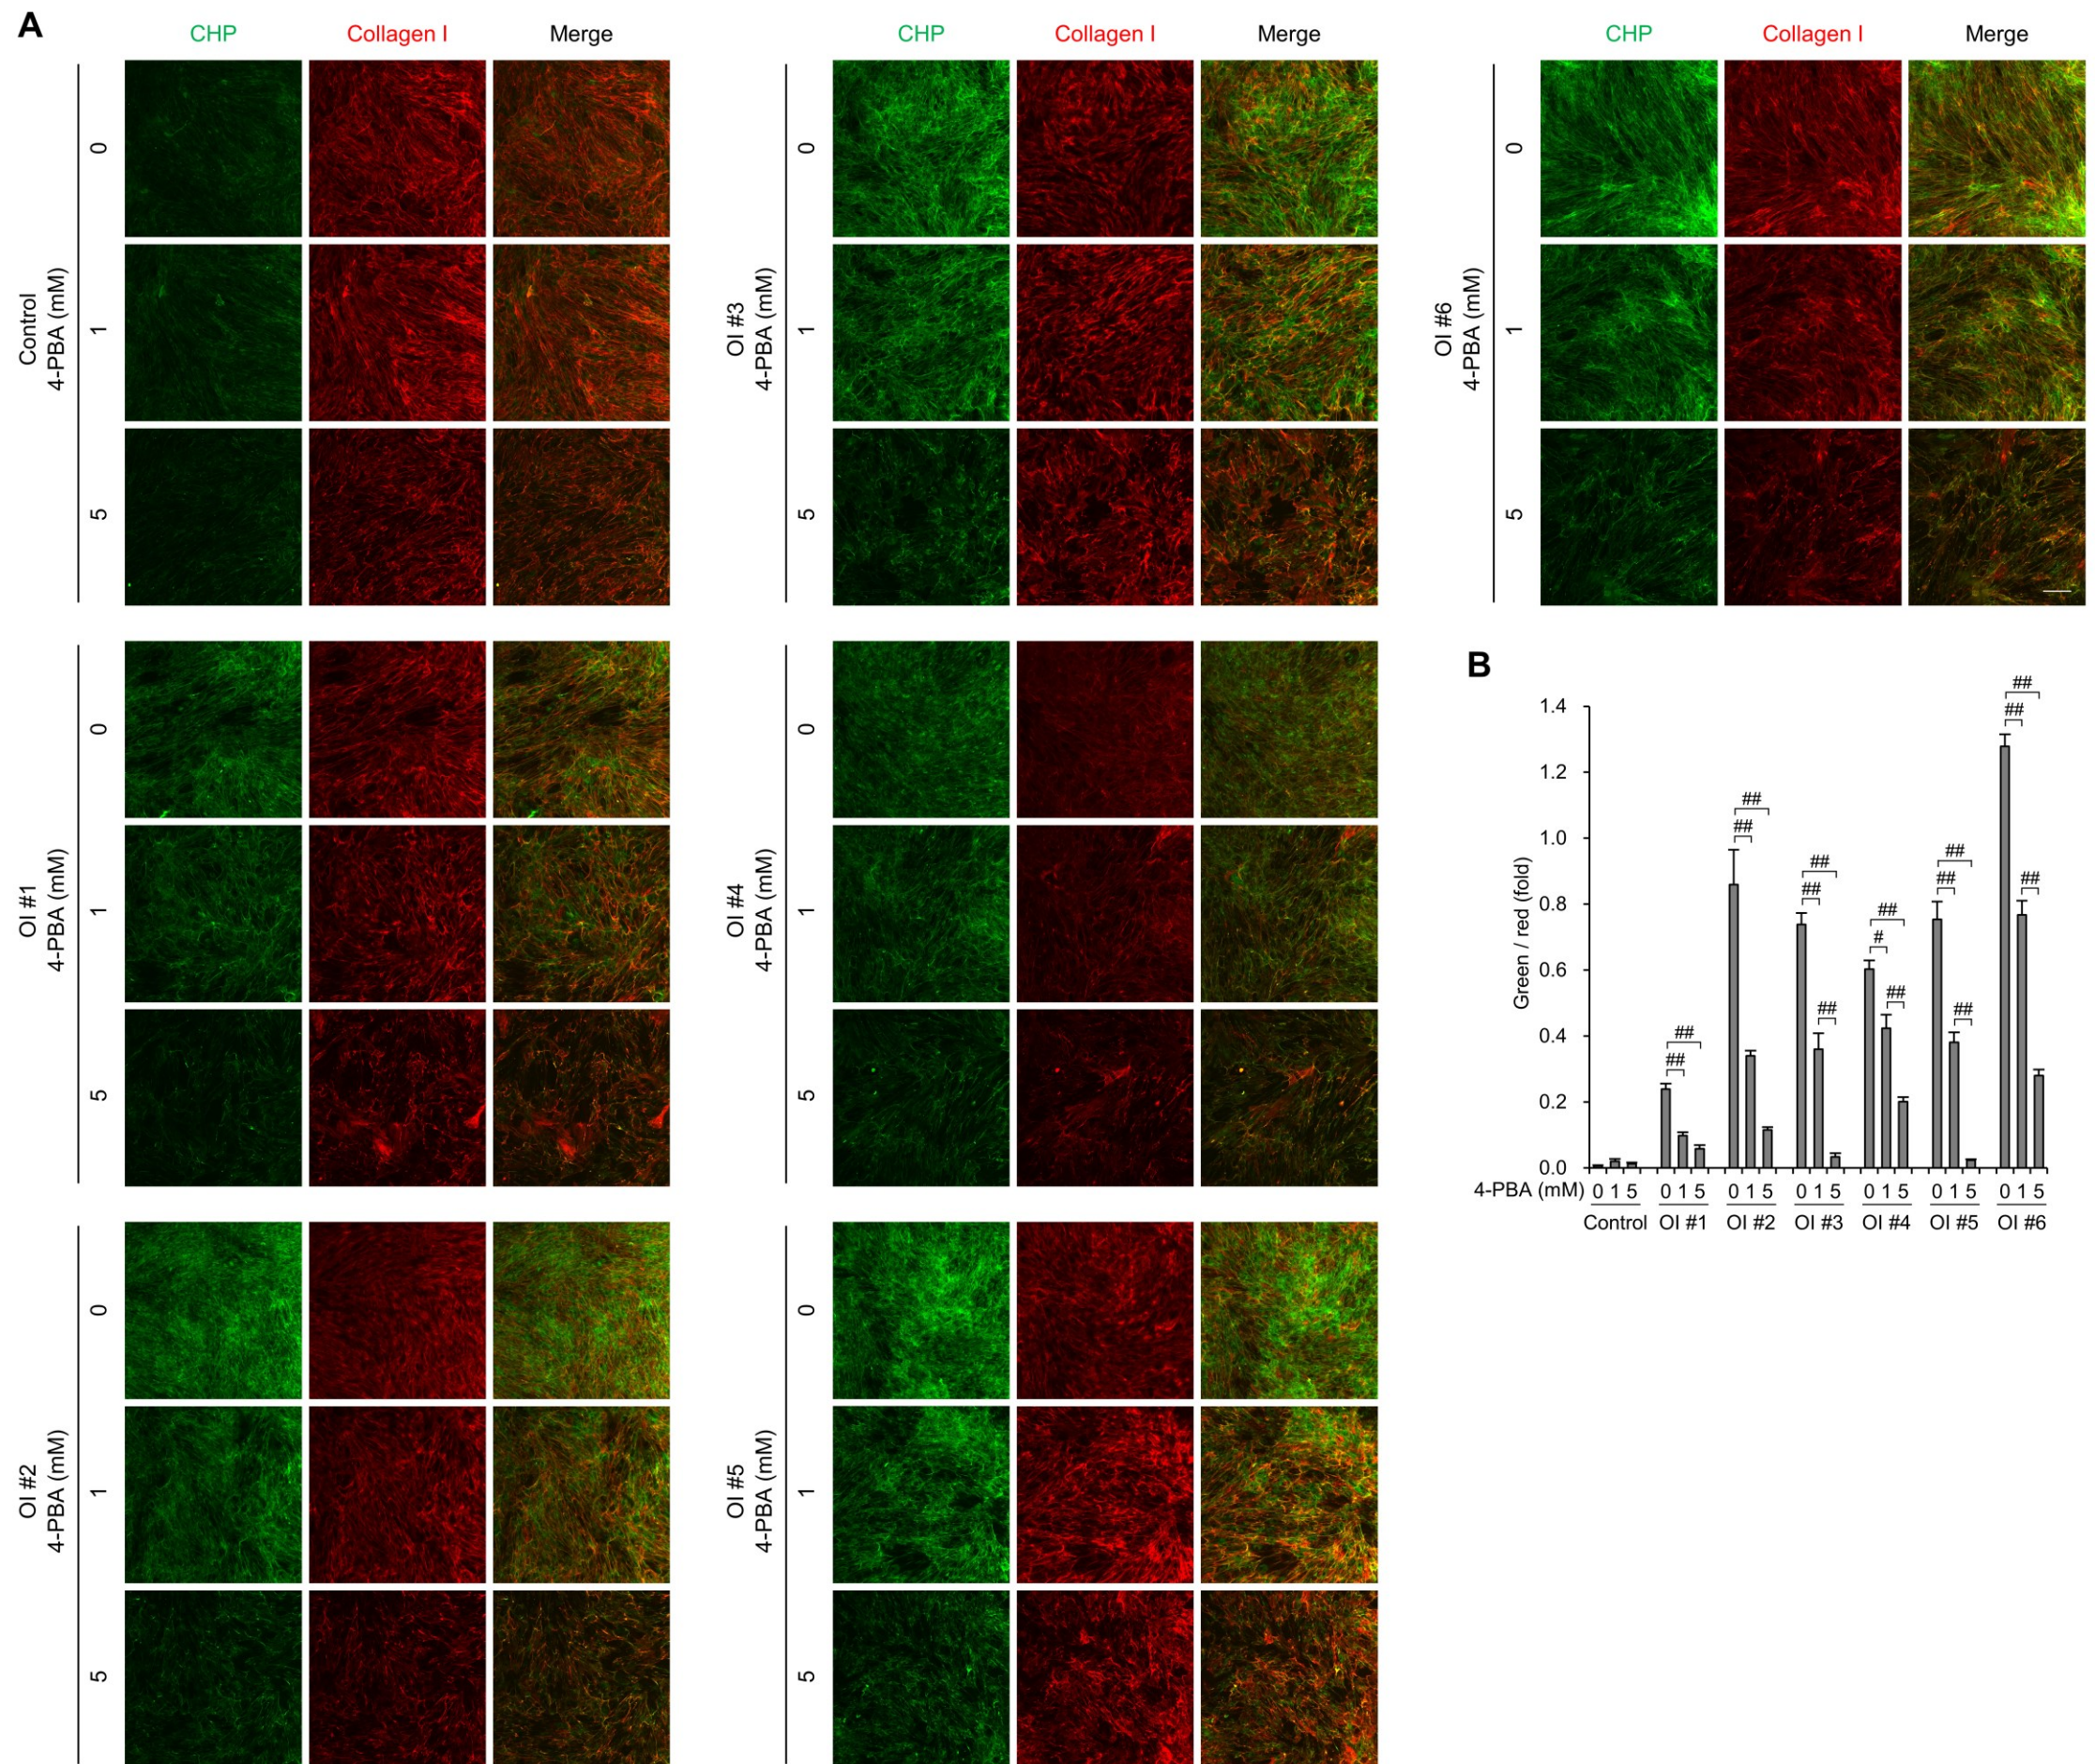

**Figure S9.** The effect of 4-phenylbutyric acid (4-PBA) on type I collagen in the extracellular matrix. **A.** Fluorescence staining of deposited collagen. Misfolded triple-helical chains are stained in green by collagen hybridizing peptide (CHP). Type I collagen is stained red. Image panels of OI #3 are redisplay of image panels of Figure 7. Scale bar is 200  $\mu$ m. **B.** Calculated values of fluorescence staining. The formula for calculation is as follows: (green area  $\times$  green fluorescence density)/(red area  $\times$  red fluorescence density). Data are mean  $\pm$  SEM. Differences were tested by ANOVA followed by Tukey's HSD post hoc test. # $P < 0.05$ , ## $P < 0.01$ .



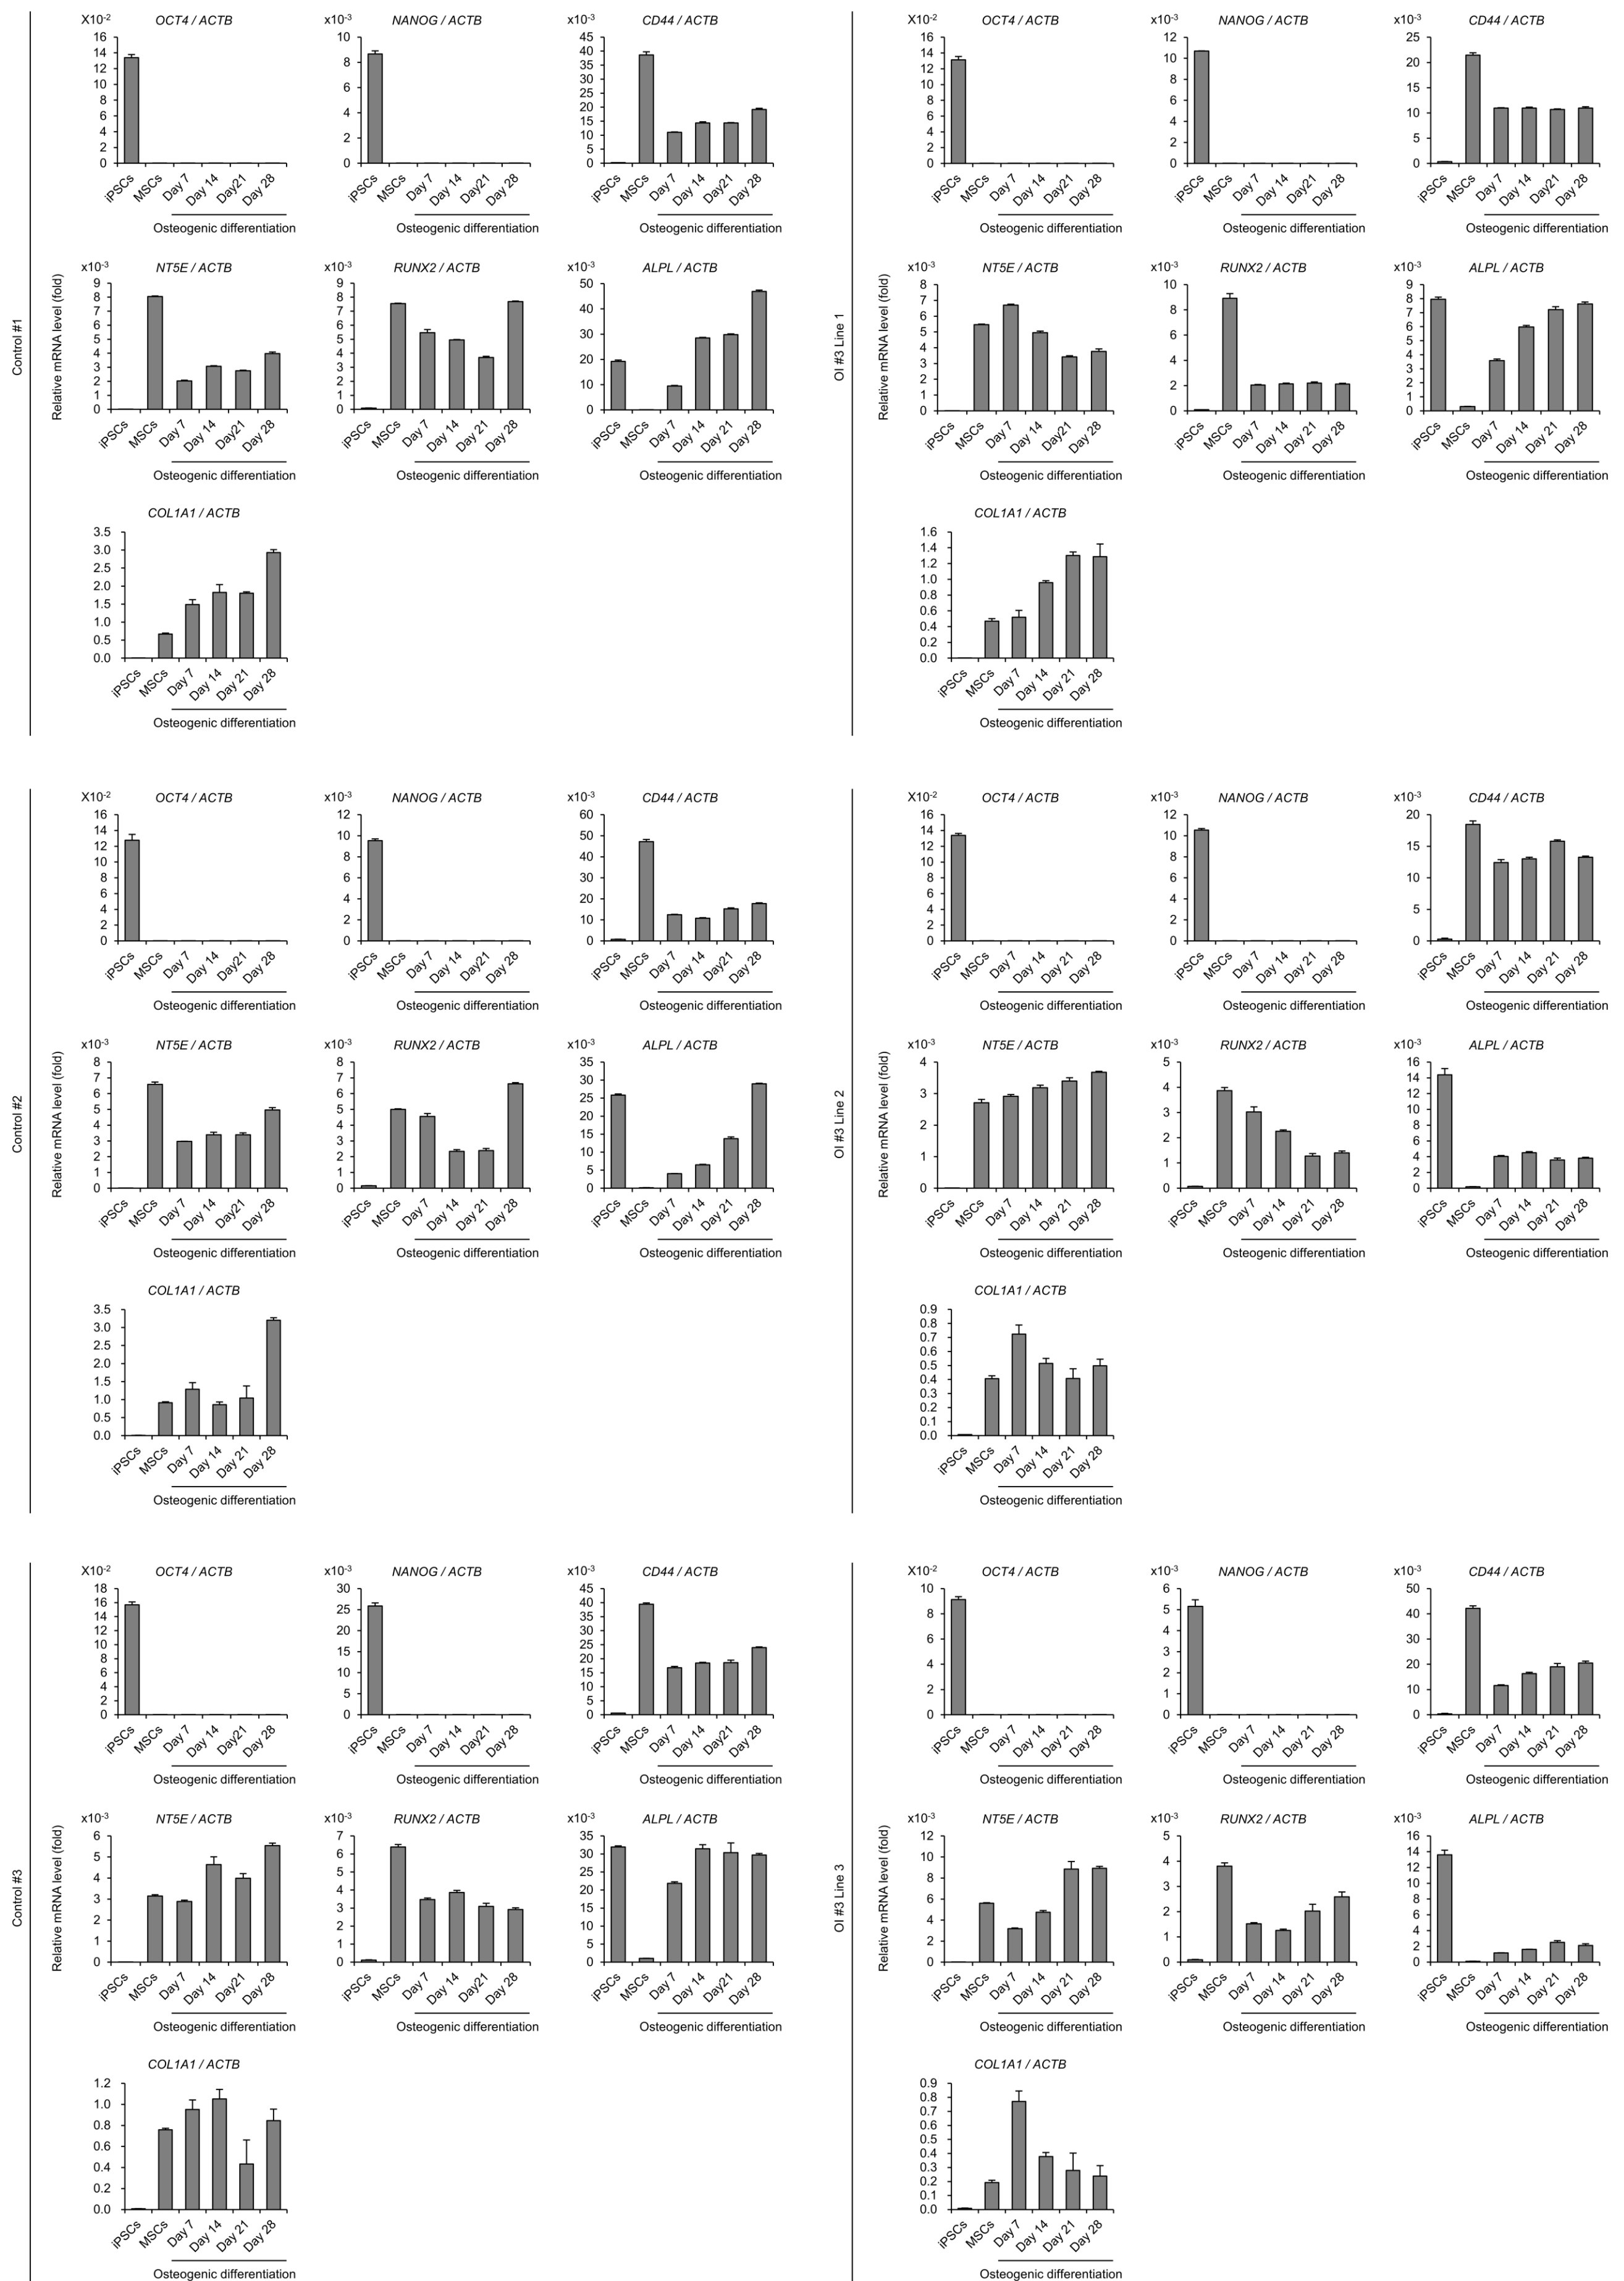

**Figure S10.** Gene expression of control and OI #3 cell lines. Pluripotency markers, *OCT4* and *NANOG*, mesenchymal stromal cell (MSC) markers, *CD44* and *NT5E*, and osteogenic markers, *RUNX2*, *ALPL*, and *COL1A1* were checked in induced pluripotent stem cells (iPSCs) and MSCs and after osteogenic differentiation for 7, 14, 21, and 28 d by real-time quantitative PCR. The values are indicated as relative gene expression using *ACTB* as a reference gene. All data are mean  $\pm$  SEM.

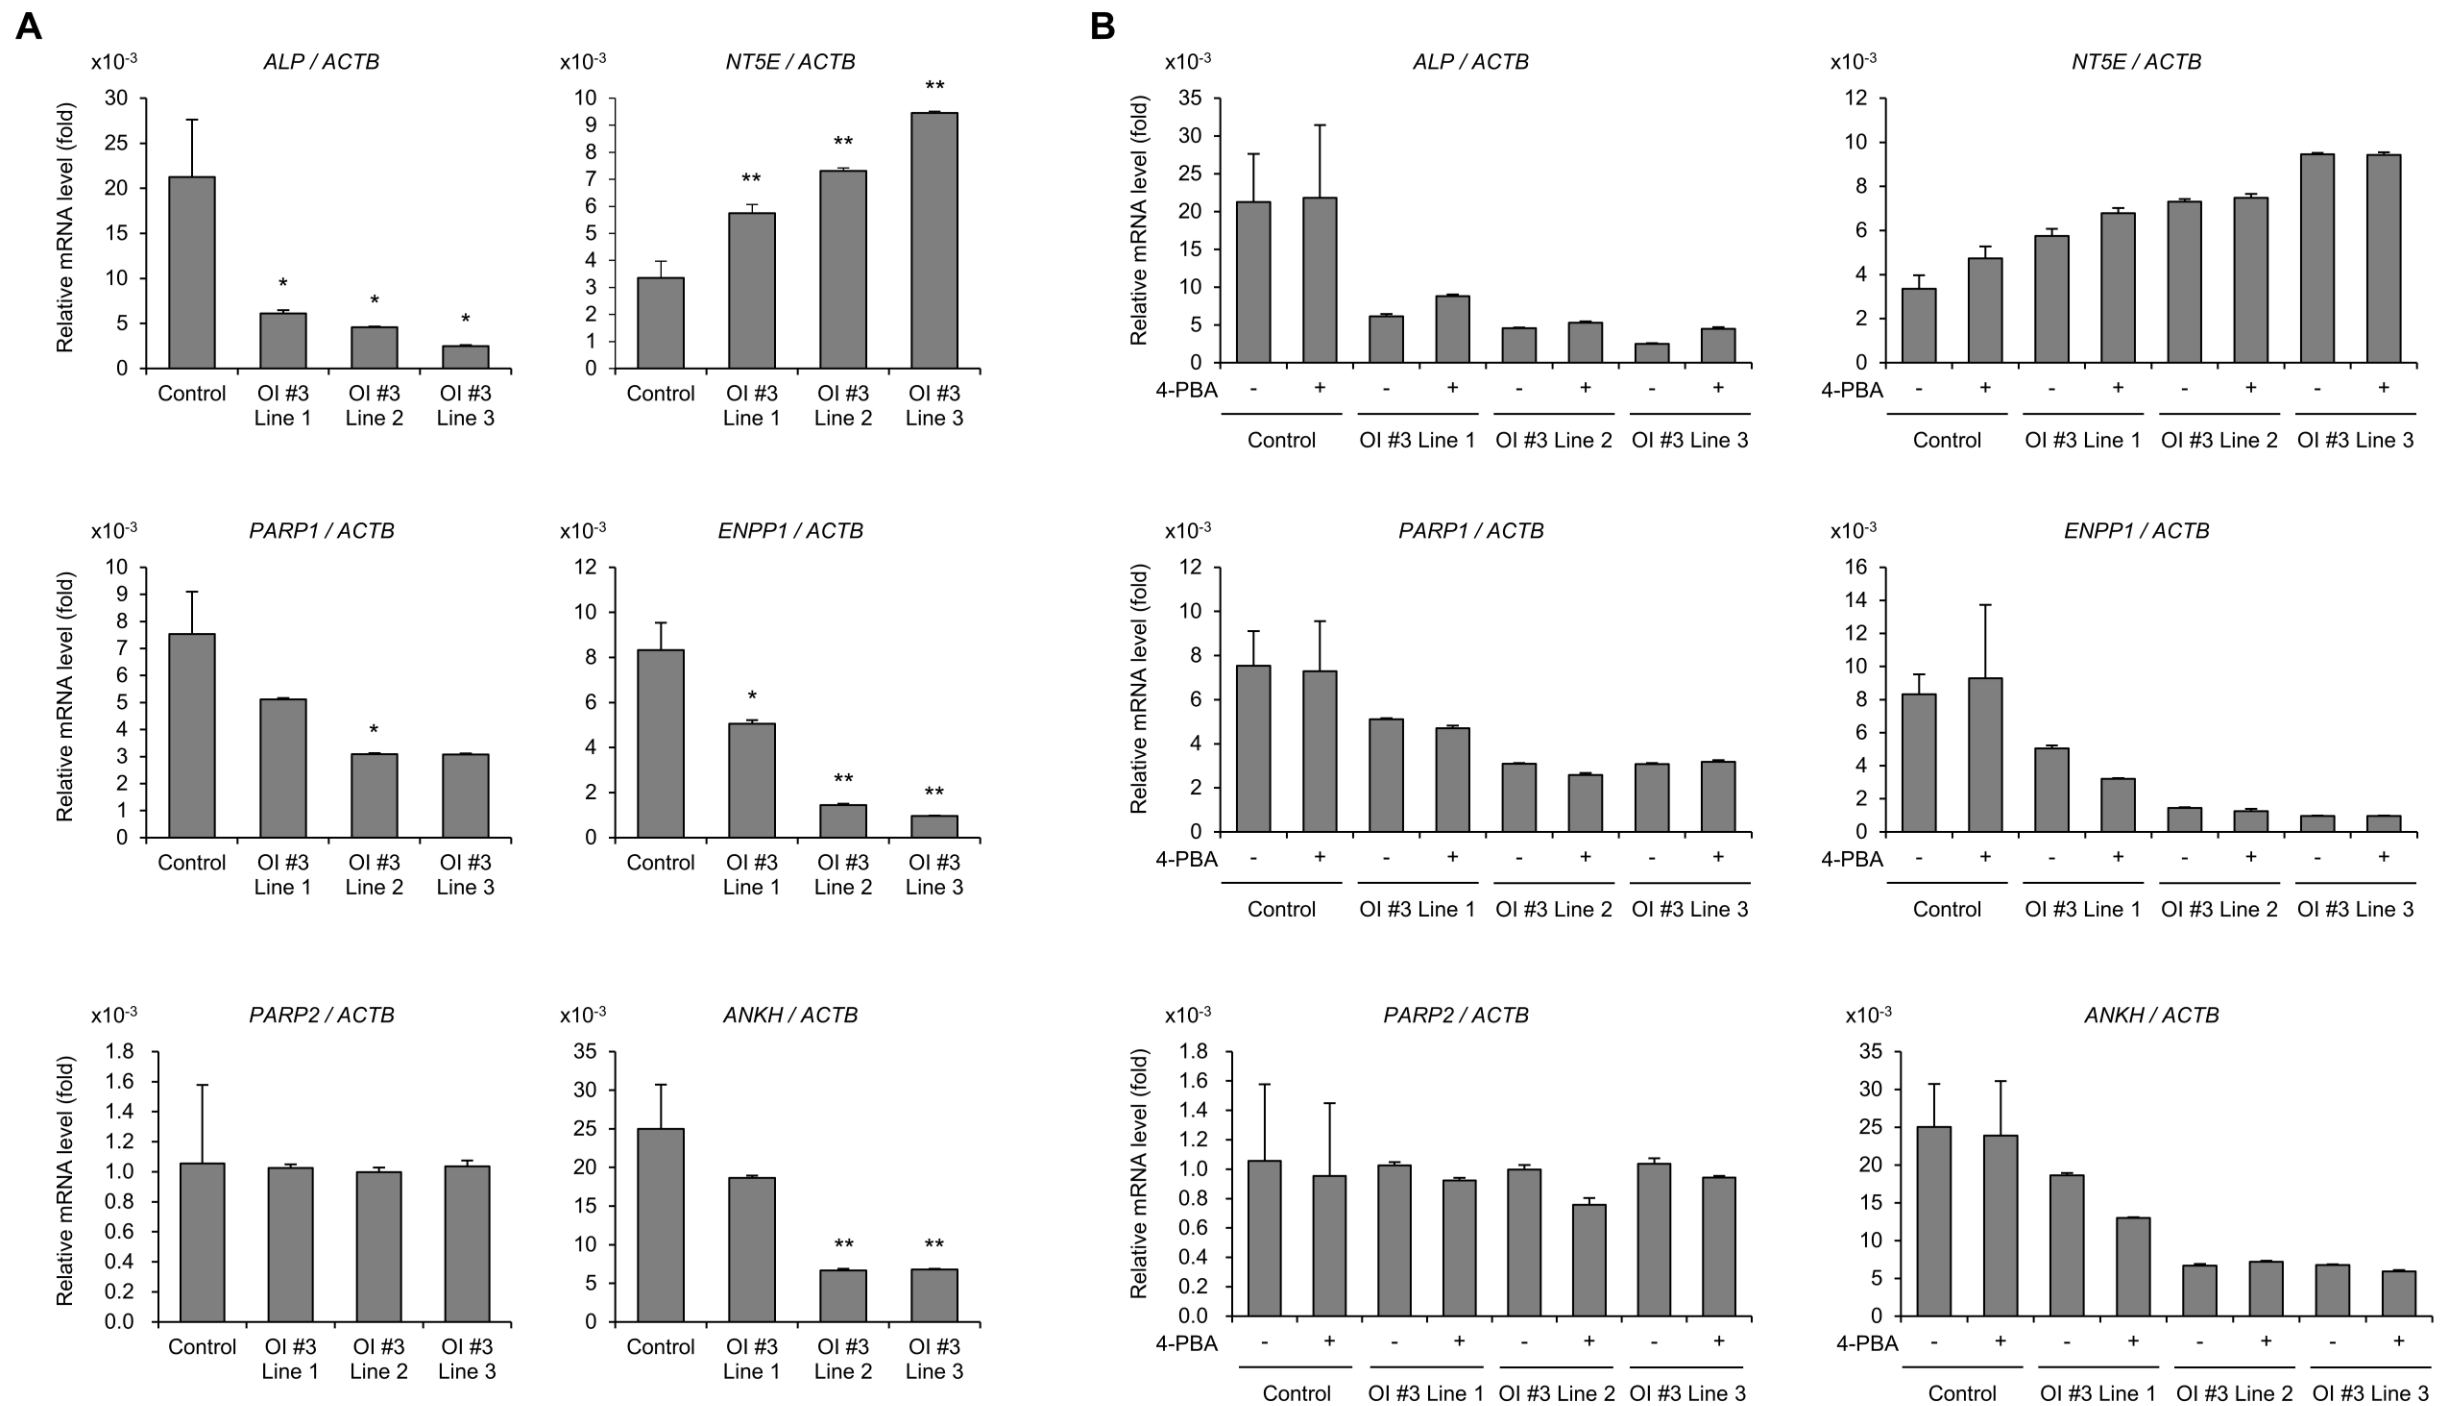

**Figure S11.** Gene expression of control and OI #3 cell lines. Pro-calcification genes, *ALPL*, *PARP1*, and *PARP2*, and anti-calcification genes, *NT5E*, *ENPP1*, and *ANKH*, were checked at day 14 following osteoblast differentiation with no 4-phenylbutyric acid (4-PBA) (**A**) and with or without 4-PBA (**B**) by real-time quantitative PCR. The values are indicated as relative gene expression using *ACTB* as a reference gene. All data are mean  $\pm$  SEM. Differences were tested by ANOVA followed by Tukey's HSD post hoc test. \* $P < 0.05$  vs. control, \*\* $P < 0.01$  vs. control.



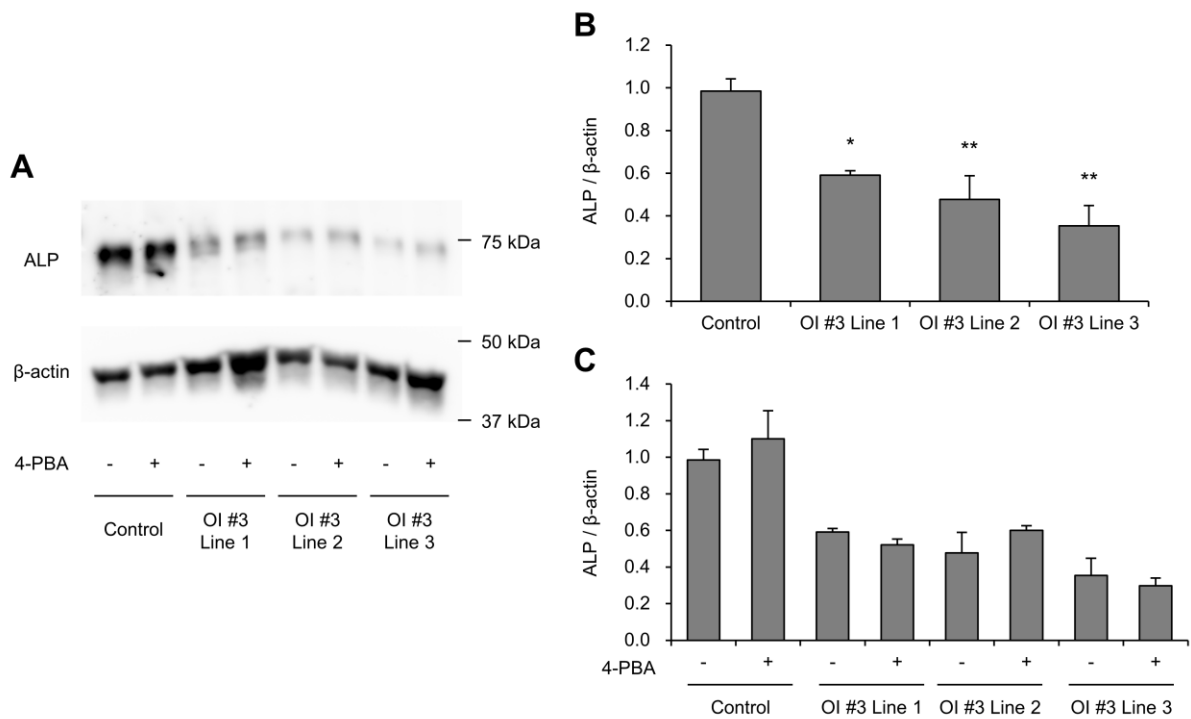

**Figure S12.** Protein level of alkaline phosphatase (ALP) in control and OI #3 cell lines. **A.** Western blotting of alkaline phosphatase and  $\beta$ -actin at day 14 following osteoblast differentiation with or without 4-phenylbutyric acid (4-PBA). **B and C.** ALP levels are indicated as the relative levels of  $\beta$ -actin quantified by densitometry. All data are mean  $\pm$  SEM. Differences were tested by ANOVA followed by Tukey's HSD post hoc test. \* $P < 0.05$  vs. control, \*\* $P < 0.01$  vs. control.

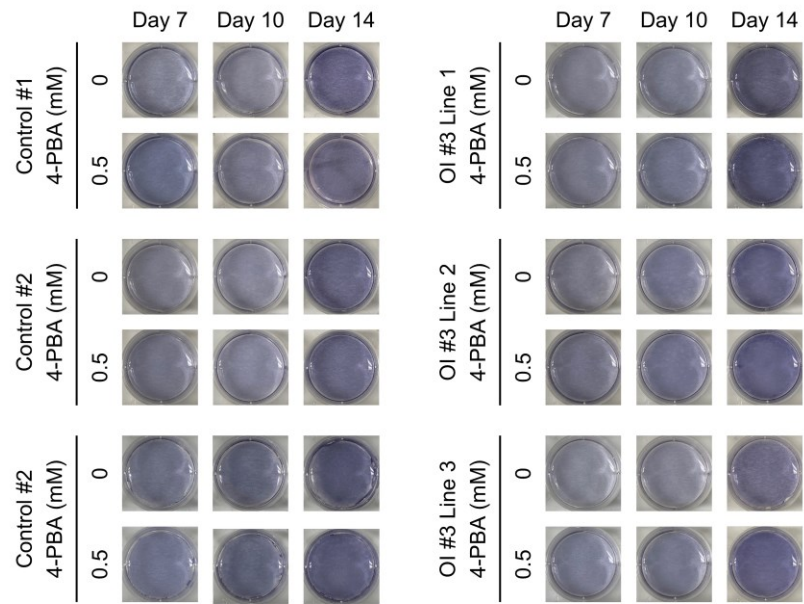

**Figure S13.** Alkaline phosphatase staining in induced osteoblasts. Induction of osteoblast differentiation from mesenchymal stromal cells was performed during the indicated day with or without 4-phenylbutyric acid (4-PBA).

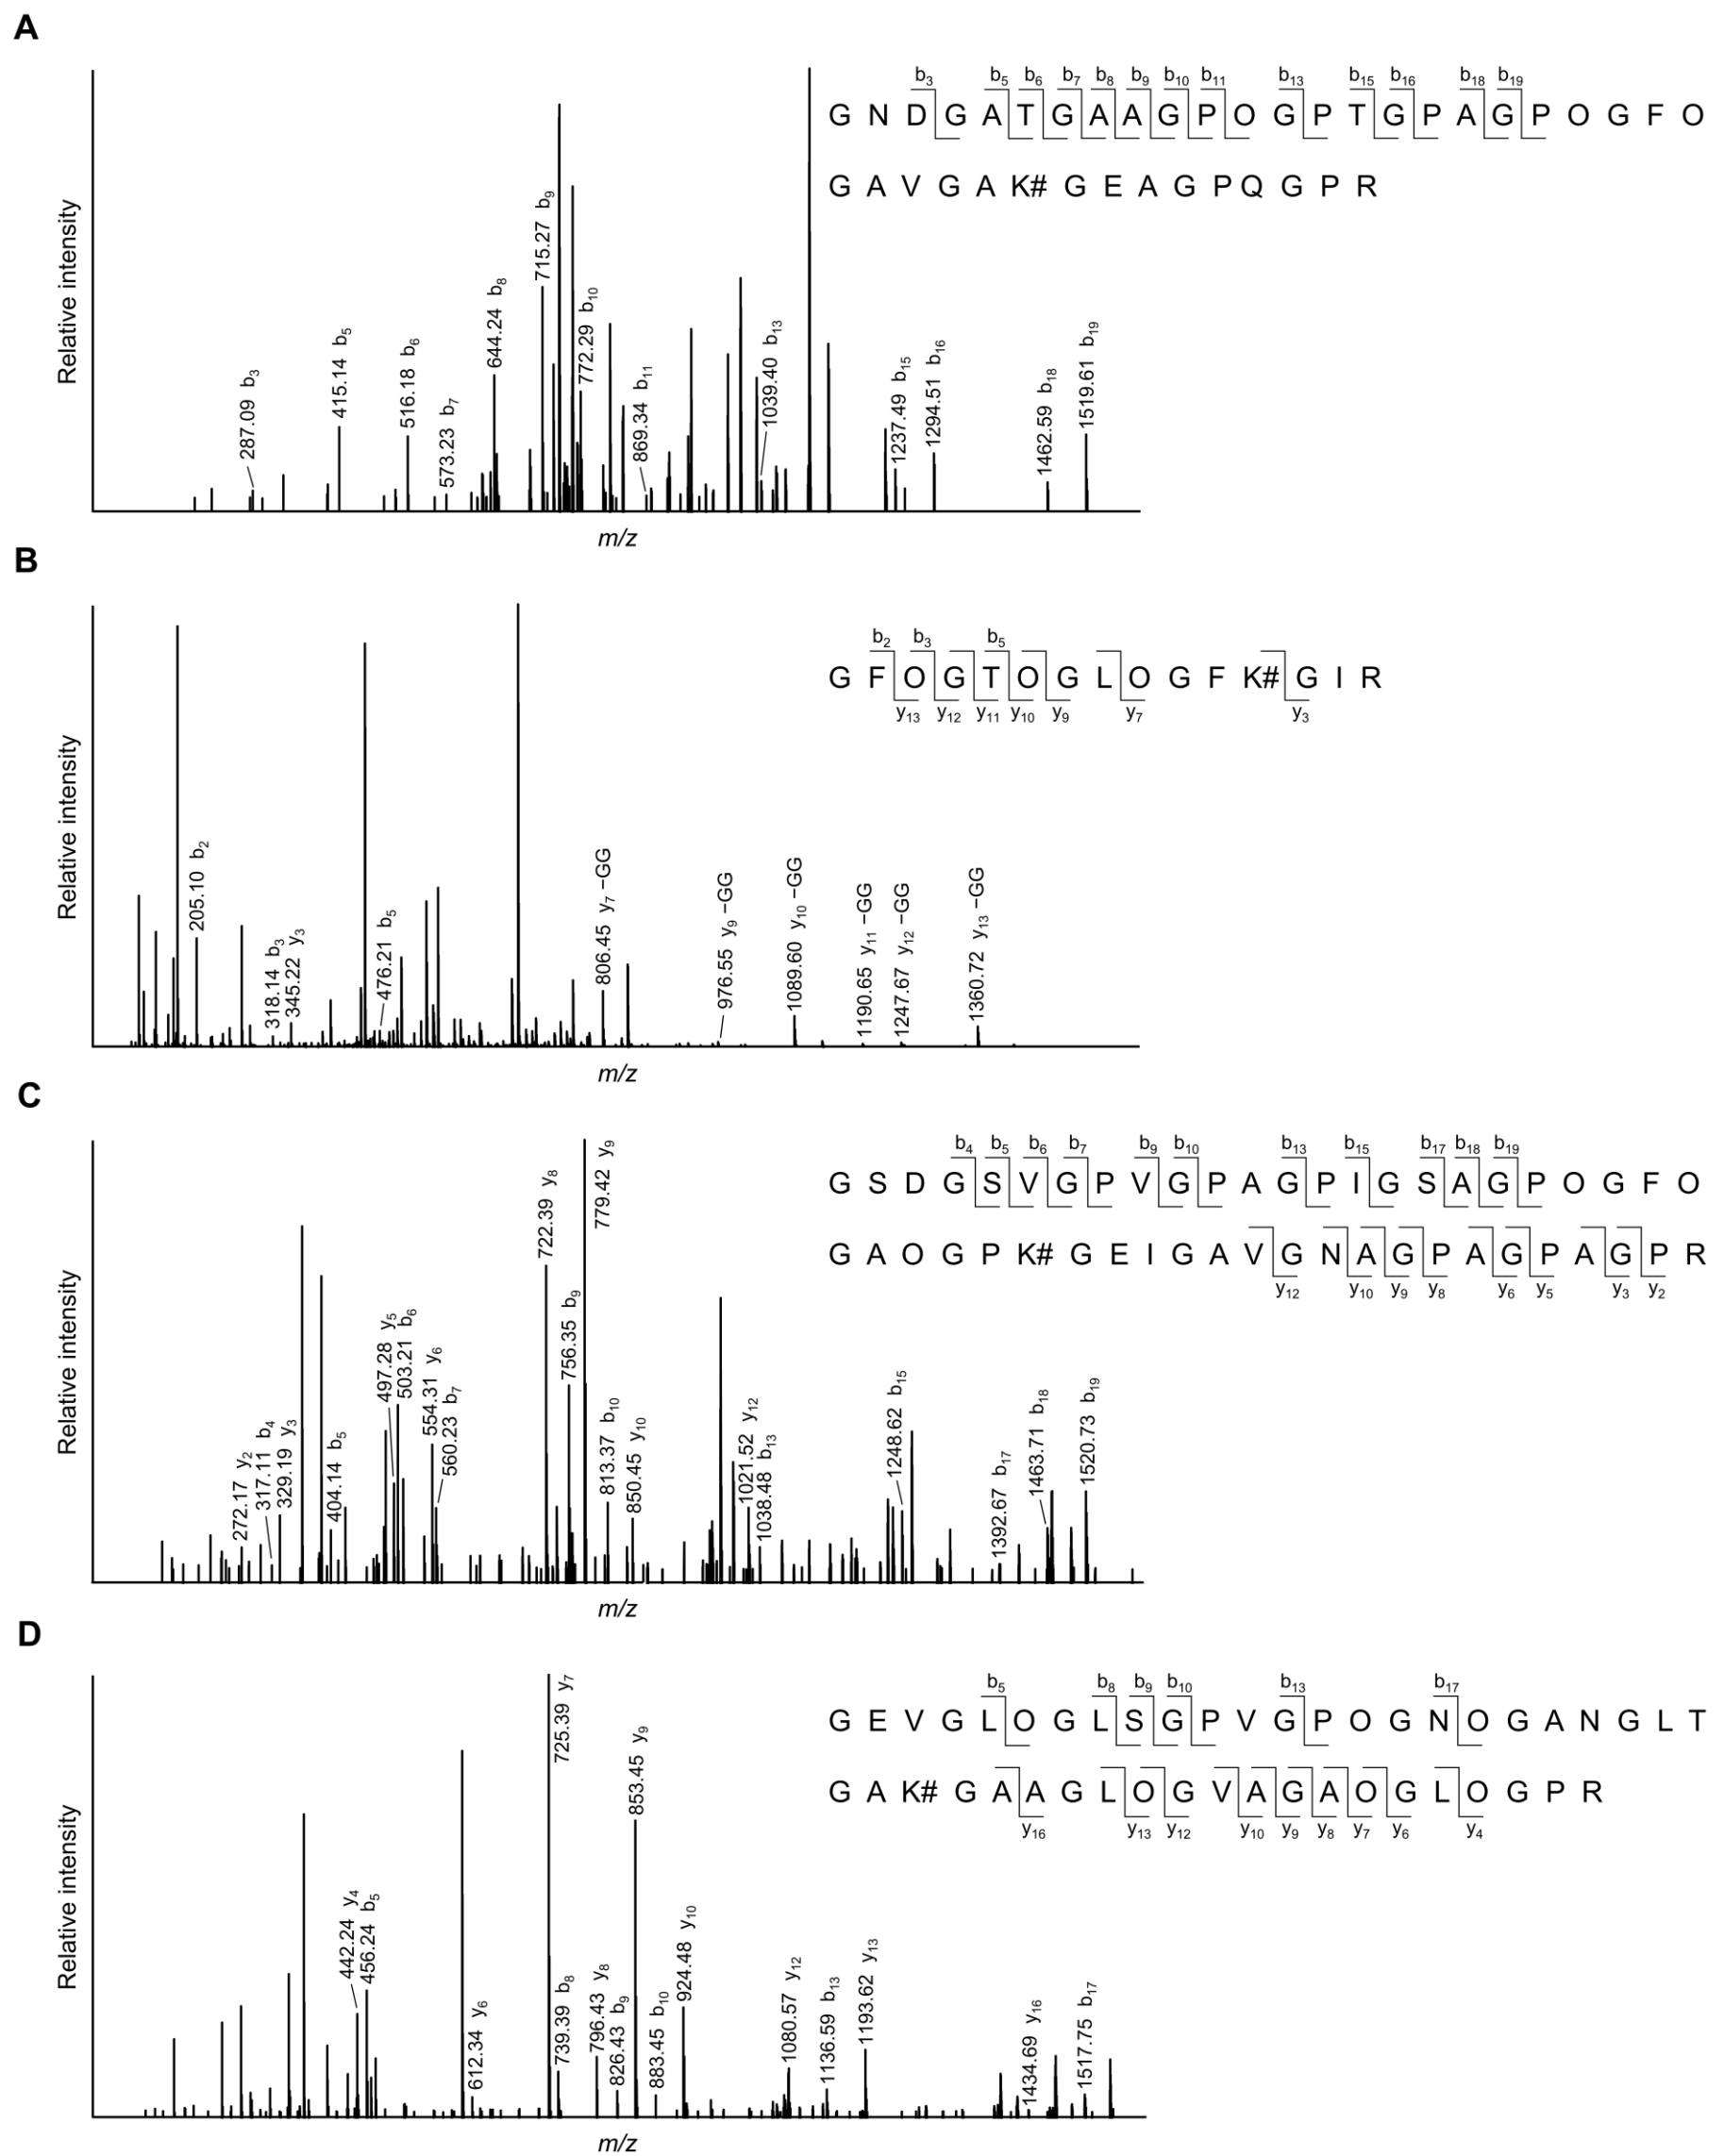

**Figure S14.** MS/MS spectra of GGHL-containing tryptic peptides in type I collagen. **A.**  $\alpha 1(I)$  [145–183] GNDGATGAAGPOGPTGPAGPOGFOGAVGAK#<sup>174</sup>GEAGPQGR ( $z = 4$ ,  $m/z$  935.1465; O indicates Hyp, and K# indicates GGHL). **B.**  $\alpha 2(I)$  [76–90] GFOGTOGLOGLFGK#<sup>87</sup>GIR ( $z = 3$ ,  $m/z$  630.3103). **C.**  $\alpha 2(I)$  [145–192] GSDGSVGPVGPAGPIGSAGPOGFOGAOGPK#<sup>174</sup>GEIGAVGNAGPAGPAGPR ( $z = 4$ ,  $m/z$  1115.5401). **D.**  $\alpha 2(I)$  [193–237] GEVGLGLSGPVGPOGNNOGANGLTGAK#<sup>219</sup>GAAGLOGVAGAOGLOGPR ( $z = 4$ ,  $m/z$  1076.2862). –GG represents deglycosylated fragment ions.
